# Supplementary material for: Drug Resistance Mechanism of M46I-Mutation-Induced Saquinavir Resistance in HIV-1 Protease Using Molecular Dynamics Simulation and Binding Energy Calculation
Source: MDPI journal article supplement (doi:10.3390/v14040697), 2022-03-28
Supplement: s1 [file s1]

**Supplementary Table S1:** Distance between amino acid residues at specific time interval of the 100 ns molecular dynamics simulation period (individual and averaged). Additionally average value during the entire period is also tabulated.

| <b>Time (ns)</b>                                    | <b>Asp25-Asp124<br/>(nm)</b> | <b>Asp25-Ile50<br/>(nm)</b> | <b>Asp25-Ile149<br/>(nm)</b> |
|-----------------------------------------------------|------------------------------|-----------------------------|------------------------------|
| <b>Unbound wild type protease (WT)</b>              |                              |                             |                              |
| 1                                                   | 0.69                         | 1.35                        | 1.16                         |
| 20                                                  | 0.70                         | 1.38                        | 1.25                         |
| 40                                                  | 0.67                         | 1.36                        | 1.15                         |
| 60                                                  | 0.68                         | 1.82                        | 1.33                         |
| 80                                                  | 0.65                         | 13.6                        | 1.42                         |
| 100                                                 | 0.64                         | 1.12                        | 1.32                         |
| <b>Average</b>                                      | 0.67                         | 1.39                        | 1.27                         |
| <b>1-100 ns MD Average Distances</b>                | 0.6529±0.02235               | 1.4359±0.1914               | 1.3359±0.1837                |
| <b>Unbound M46I mutation carrying protease (MI)</b> |                              |                             |                              |
| 1                                                   | 0.7                          | 1.47                        | 1.29                         |
| 20                                                  | 0.64                         | 1.64                        | 2.15                         |
| 40                                                  | 0.67                         | 1.73                        | 2.23                         |
| 60                                                  | 0.72                         | 1.79                        | 2.16                         |
| 80                                                  | 0.71                         | 1.58                        | 2.42                         |
| 100                                                 | 0.65                         | 1.61                        | 2.18                         |
| <b>Average</b>                                      | 0.68                         | 1.63                        | 2.071                        |
| <b>1-100 ns MD Average Distances</b>                | 0.6838±0.0338                | 1.7026±0.2291               | 2.0923±0.2797                |
| <b>Saquinavir bound wild type protease (SQ-WT)</b>  |                              |                             |                              |
| 1                                                   | 0.73                         | 1.50                        | 1.28                         |
| 20                                                  | 0.68                         | 1.24                        | 1.48                         |
| 40                                                  | 0.65                         | 1.52                        | 1.63                         |
| 60                                                  | 0.71                         | 1.45                        | 1.93                         |
| 80                                                  | 0.66                         | 1.41                        | 1.82                         |
| 100                                                 | 0.67                         | 1.58                        | 1.70                         |
| <b>Average</b>                                      | 0.68                         | 1.45                        | 1.64                         |
| <b>1-100 ns MD Average Distances</b>                | 0.6659±0.0215                | 1.5600±0.1306               | 1.7312±0.1398                |
| <b>Saquinavir bound M46I protease (SQ-MI)</b>       |                              |                             |                              |
| 1                                                   | 0.72                         | 1.45                        | 1.28                         |
| 20                                                  | 0.70                         | 1.79                        | 2.21                         |
| 40                                                  | 0.80                         | 2.16                        | 2.01                         |
| 60                                                  | 0.90                         | 1.71                        | 2.18                         |
| 80                                                  | 0.87                         | 1.71                        | 2.20                         |
| 100                                                 | 0.76                         | 2.29                        | 2.20                         |
| <b>Average</b>                                      | 0.79                         | 1.85                        | 2.013                        |
| <b>1-100 ns MD Average Distances</b>                | 0.7843±0.0715                | 1.8856±0.2939               | 2.0348±0.3014                |

### Supplementary Figure S1

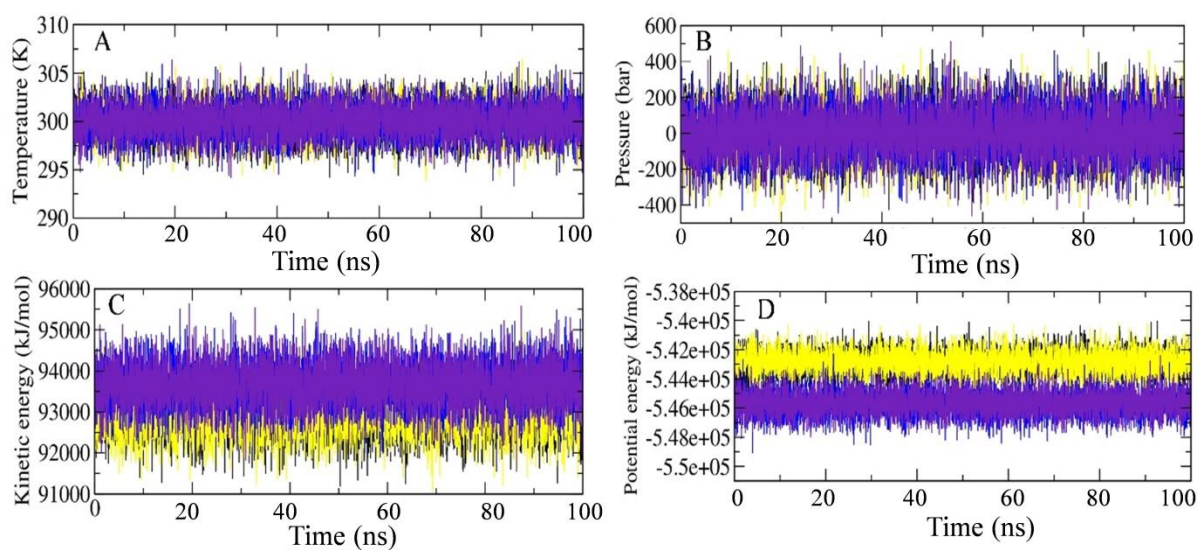

**Supplementary Figure S1:** Temperature (A), pressure (B), Kinetic energy (C), and potential energy (D) of WT (Black), MI (Yellow), SQ-WT (Blue), and SQ-MI (Purple) simulation systems. WT- Wild type, SQ-WT- Saquinavir bound wild type, MI- M46I mutation carrying protease, and SQ-MI- Saquinavir bound mutation carrying protease.

## Supplementary Figure S2

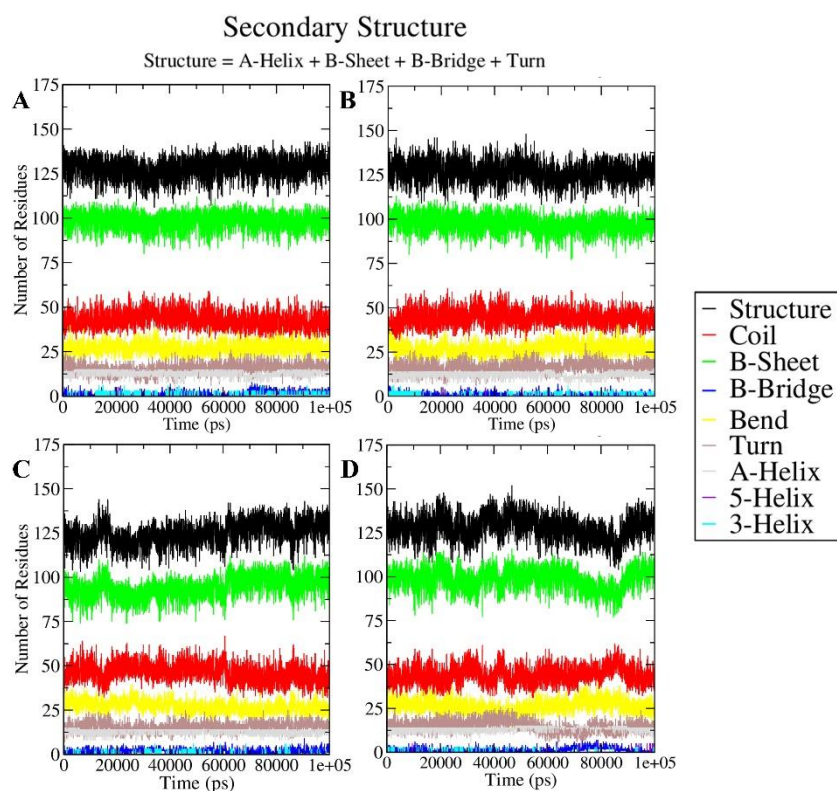

**Supplementary Figure S2:** Evolution of secondary structure during 100 ns MD simulation for WT (A), MI (B), SQ-WT (C), and SQ-MI (D). WT- Wild type, SQ-WT- Saquinavir bound wild type, MI- M46I mutation carrying protease, and SQ-MI- Saquinavir bound mutation carrying protease.

### Supplementary Figure S3

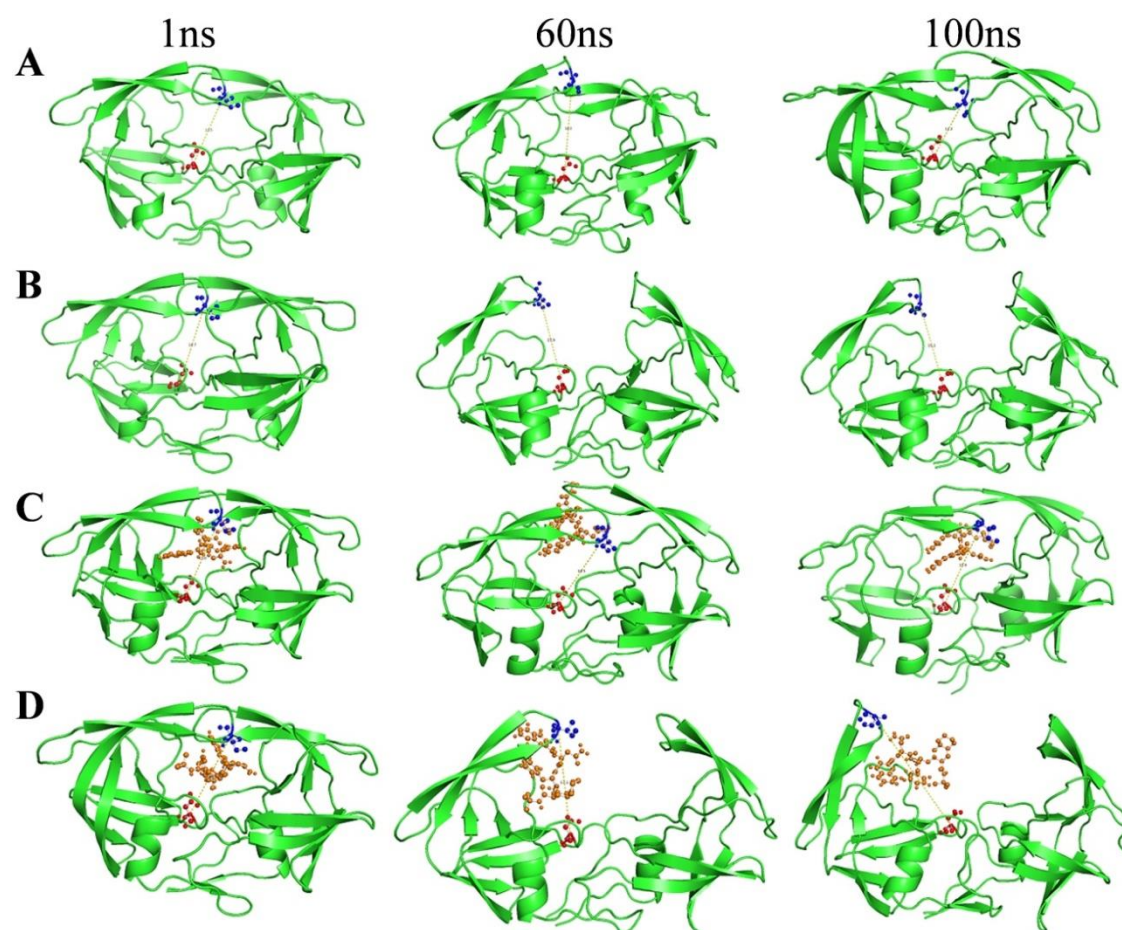

**Supplementary Figure S3:** Distance between Asp25-Ile50 amino acid residues in (A) WT, (B) MI (C) SQ-WT and (D) SQ-MI systems at 1, 60 and 100 ns simulation period. WT- Wild type, SQ-WT- Saquinavir bound wild type, MI- M46I mutation carrying protease, and SQ-MI- Saquinavir bound mutation carrying protease.

### Supplementary Figure S4

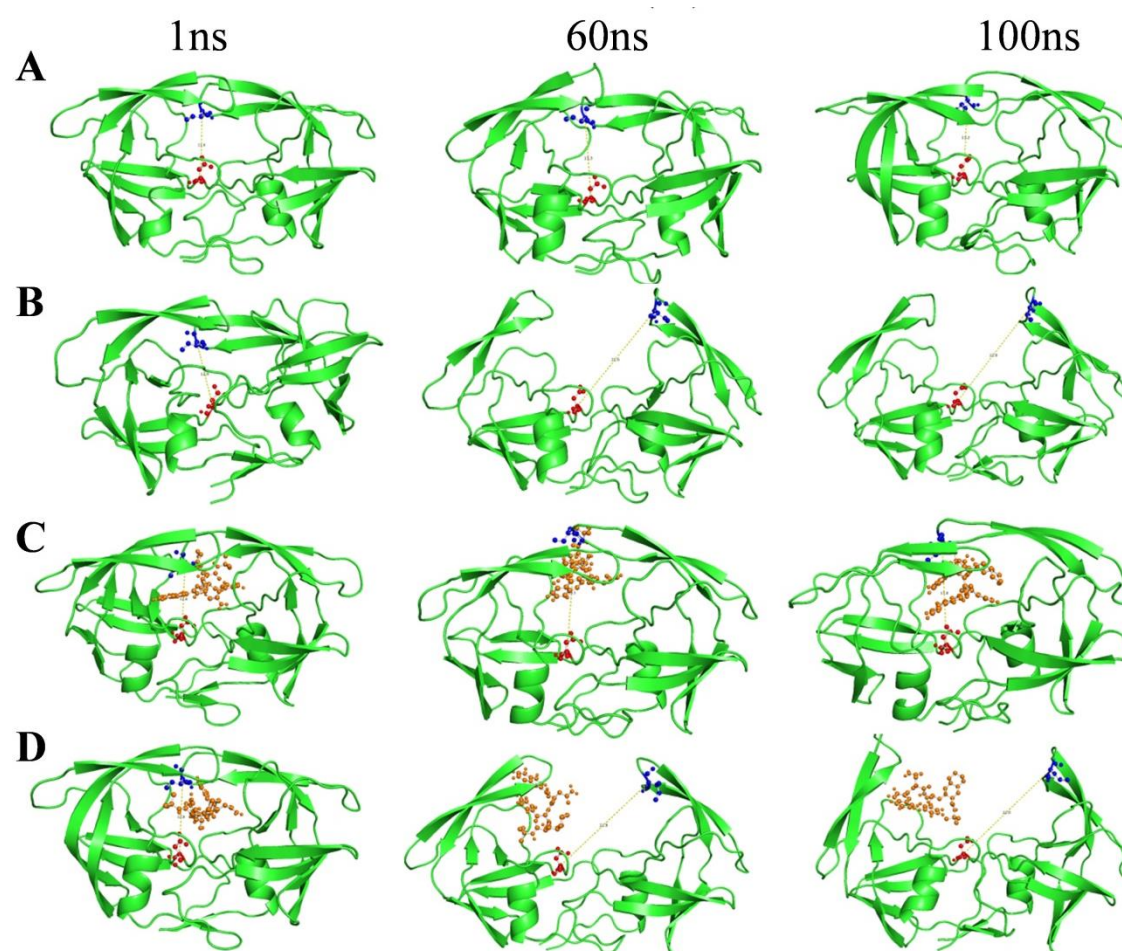

**Supplementary Figure S4:** Distance between Asp25-Ile149 amino acid residues in (A) WT, (B) MI (C) SQ-WT and (D) SQ-MI systems at 1, 60 and 100 ns simulation period. WT- Wild type, SQ-WT- Saquinavir bound wild type, MI- M46I mutation carrying protease, and SQ-MI- Saquinavir bound mutation carrying protease.



### Supplementary Figure S5

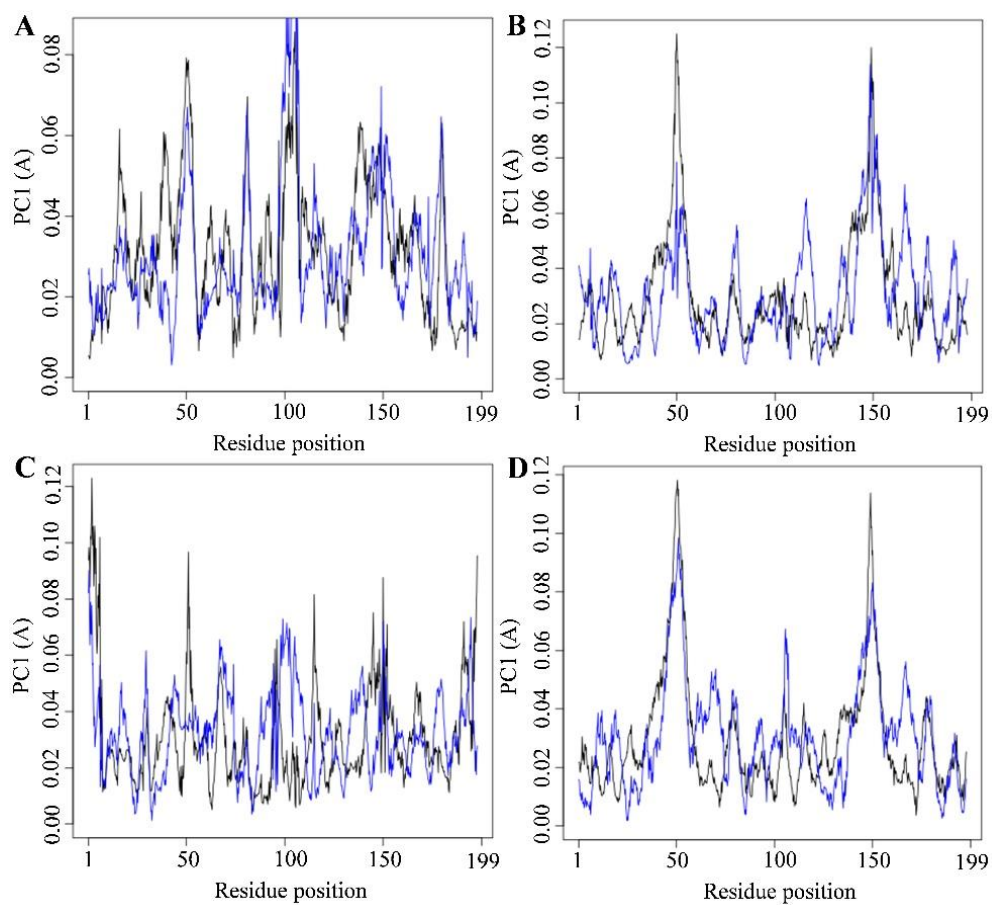

**Supplementary Figure S5:** Projection of PC1 (Blue) on RMSF (Black) during 100 ns MD simulation for WT (A), MI (B), SQ-WT (C), and SQ-MI (D). WT- Wild type, SQ-WT- Saquinavir bound wild type, MI- M46I mutation carrying protease, and SQ-MI- Saquinavir bound mutation carrying protease.

## Supplementary Figure S6

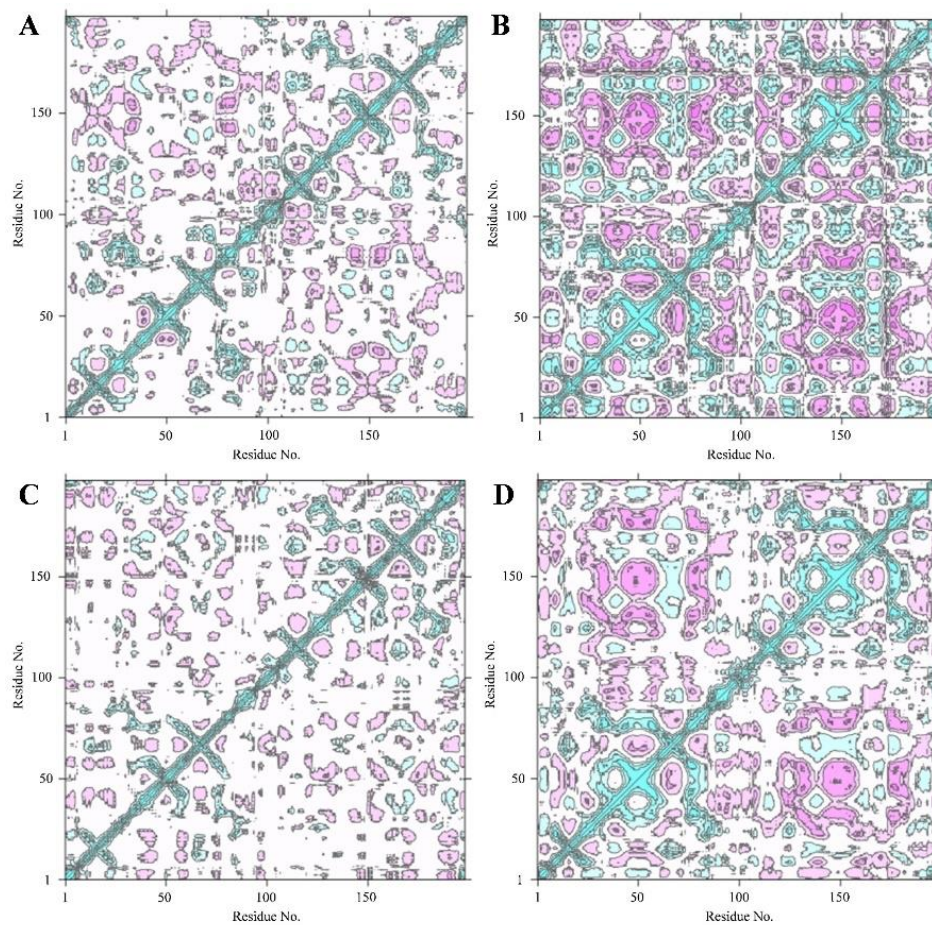

**Supplementary Figure S6:** Dynamic cross correlation matrix (DCCM) of test systems during 100 ns MD simulation for WT (A), MI (B), SQ-WT (C), and SQ-MI (D). WT- Wild type, SQ-WT- Saquinavir bound wild type, MI- M46I mutation carrying protease, and SQ-MI- Saquinavir bound mutation carrying protease.
